# Supplementary material
Source: MDPI journal article supplement (https://www.mdpi.com/1424-8247/16/9/1328)
Supplement: s1 [file pharmaceuticals-2585466-supplementary.pdf › pharmaceuticals-2585466-supplementary.pdf]

## Supplementary materials

**Table S1.** Detailed Search Strategy

---

**Pubmed & CENTRAL search strategy**

1. "chronic steroid"[Title/Abstract] OR "chronic corticosteroid"[Title/Abstract] OR "chronic predniso"[Title/Abstract] OR "long term steroid"[Title/Abstract] OR "long-term steroid"[Title/Abstract] OR "pre-operative steroid"[Title/Abstract] OR "preoperative steroid"[Title/Abstract] OR "long term corticosteroid"[Title/Abstract] OR "long-term corticosteroid"[Title/Abstract] OR "pre-operative corticosteroid"[Title/Abstract] OR "preoperative corticosteroid"[Title/Abstract] OR "long term predniso"[Title/Abstract] OR "long-term predniso"[Title/Abstract] OR "preoperative predniso"[Title/Abstract] OR "pre-operative predniso"[Title/Abstract]
  2. "surgical procedures, operative"[MeSH Terms] OR "surgery"[Text Word] OR "operation"[Text Word]
  3. 1 AND 2
- 

**Embase search strategy**

1. 'chronic steroid\*'
  2. 'chronic corticosteroid\*'
  3. 'chronic predniso\*'
  4. 'long-term steroid\*'
  5. 'long term steroid\*'
  6. 'pre-operative steroid\*'
  7. 'preoperative steroid\*'
  8. 'long-term corticosteroid\*'
  9. 'long term corticosteroid\*'
  10. 'pre-operative corticosteroid\*'
  11. 'preoperative corticosteroid\*'
  12. 'long-term predniso\*'
  13. 'long term predniso\*'
  14. 'pre-operative predniso\*'
  15. 'preoperative predniso\*'
  16. #1 OR #2 OR #3 OR #4 OR #5 OR #6 OR #7 OR #8 OR #9 OR #10 OR #11 OR #12 OR #13 OR #14 OR #15
  17. Operation
  18. Surgery
  19. #17 OR #18
  20. #16 AND #19
-

**Figure S1.** Risk of bias of included cohort studies. Green dots indicate low risk of bias, yellow dots for unclear risk of bias and red dots for high risk of bias.

|                        | Representativeness of the exposed cohort | Selection of the non exposed cohort | Ascertainment of exposure | Demonstration that outcome of interest was not present at start of study | Comparability of cohorts on the basis of the design or analysis | Assessment of outcome | Was follow-up long enough for outcomes to occur | Adequacy of follow up of cohorts |
|------------------------|------------------------------------------|-------------------------------------|---------------------------|--------------------------------------------------------------------------|-----------------------------------------------------------------|-----------------------|-------------------------------------------------|----------------------------------|
| Aziz KT (2021)         | +                                        | +                                   | +                         | +                                                                        | ?                                                               | +                     | +                                               | +                                |
| Boddapati V (2018)     | +                                        | +                                   | +                         | +                                                                        | +                                                               | +                     | +                                               | +                                |
| Boylan MR (2016)       | +                                        | +                                   | ?                         | +                                                                        | +                                                               | ?                     | +                                               | +                                |
| Cloney MB (2018)       | +                                        | +                                   | +                         | +                                                                        | ?                                                               | +                     | +                                               | +                                |
| Fassihi SC (2020)      | +                                        | +                                   | +                         | +                                                                        | ?                                                               | +                     | +                                               | +                                |
| Ifarraguerri AM (2023) | +                                        | +                                   | +                         | +                                                                        | ?                                                               | +                     | +                                               | +                                |
| Kantar RS (2015)       | +                                        | +                                   | +                         | +                                                                        | +                                                               | +                     | +                                               | +                                |
| Kebaish KJ (2021)      | +                                        | +                                   | +                         | +                                                                        | +                                                               | +                     | +                                               | +                                |
| Kittle H (2020)        | +                                        | +                                   | +                         | +                                                                        | +                                                               | +                     | +                                               | +                                |
| Lee R (2020)           | +                                        | +                                   | ?                         | +                                                                        | +                                                               | ?                     | +                                               | +                                |
| Newton WN (2023)       | +                                        | +                                   | +                         | +                                                                        | ?                                                               | +                     | +                                               | +                                |
| Quan (2022)            | +                                        | +                                   | +                         | +                                                                        | ?                                                               | +                     | +                                               | +                                |
| Roberts S (2021)       | +                                        | +                                   | ?                         | +                                                                        | +                                                               | ?                     | +                                               | +                                |
| Singla A (2019)        | ?                                        | +                                   | ?                         | +                                                                        | +                                                               | ?                     | +                                               | +                                |
| Tihista M (2020)       | +                                        | +                                   | +                         | +                                                                        | ?                                                               | +                     | +                                               | +                                |
| White SJW (2019a)      | +                                        | +                                   | +                         | +                                                                        | ?                                                               | +                     | +                                               | +                                |
| White SJW (2019b)      | +                                        | +                                   | +                         | +                                                                        | ?                                                               | +                     | +                                               | +                                |

**Table S2.** Summary of Crude and Adjusted Risk Estimates of Mortality, Overall Complications, Wound Dehiscence, Re-Admission, and Re-Operation.

| Study                         | Outcome of interest | Event/total (n/N)                                        | Crude OR [95%CI]   | Adjusted OR [95%CI]            | Adjusted factors                                                                        |
|-------------------------------|---------------------|----------------------------------------------------------|--------------------|--------------------------------|-----------------------------------------------------------------------------------------|
| <b>Mortality</b>              |                     |                                                          |                    |                                |                                                                                         |
| Boddapati V, et al (2018)     | 30-day mortality    | Steroid group: 9/3714<br>Non-steroid group: 166/97818    | 1.43 [0.73, 2.80]  | 1.00 [0.35, 2.85]              | Age, sex, BMI, comorbidities, ASA class, anesthesia type, operative duration (Matching) |
| Fassihi SC, et al (2020)      | 30-day mortality    | Steroid group: 3/474<br>Non-steroid group: 20/10499      | 3.34 [0.99, 11.27] | 1.92 [0.55, 6.69] <sup>¶</sup> | Not well documented                                                                     |
| Ifarraguerri AM, et al (2023) | 30-day mortality    | Steroid group: 0/178<br>Non-steroid group: 25/10153      | 1.11 [0.07, 18.35] | NA                             | NA                                                                                      |
| Kebaish KJ, et al (2021)      | 30-day mortality    | Steroid group: 10/5243<br>Non-steroid group: 200/135276  | 1.29 [0.68, 2.44]  | 0.79 [0.42, 1.50]              | Age, sex, BMI, functional status, procedure type, and ASA class                         |
| Kittle H, et al (2020)        | 30-day mortality    | Steroid group: 0/14774<br>Non-steroid group: 6/388792    | 2.02 [0.11, 35.93] | NA                             | NA                                                                                      |
| Lee R, et al (2020)           | 30-day mortality    | Steroid group: 3/198<br>Non-steroid group: 10/5179       | 7.95 [2.17, 29.12] | 7.60 [1.26, 45.78]             | Age, sex, smoking, comorbidities, ASA class (Matching)                                  |
| Quan, et al (2022)            | 30-day mortality    | Steroid group: 1/360<br>Non-steroid group: 17/16145      | 2.64 [0.35, 19.91] | NA                             | NA                                                                                      |
| Singla A, et al (2019)        | 1-year mortality    | Steroid group: 39/11687<br>Non-steroid group: 326/348318 | 3.57 [2.56, 4.98]  | 2.06 [1.13, 3.78]              | Comorbidities                                                                           |
| Tihista M, et al (2020)       | 30-day mortality    | Steroid group: 1/1044<br>Non-steroid group: 34/25690     | 0.72 [0.10, 5.29]  | NA                             | NA                                                                                      |
| White SJW, et al (2019a)      | 30-day mortality    | Steroid group: 1/289<br>Non-steroid group: 21/9194       | 1.52 [0.20, 11.31] | NA                             | NA                                                                                      |

|                              |                      |                                                           |                    |                      |                                                                                         |
|------------------------------|----------------------|-----------------------------------------------------------|--------------------|----------------------|-----------------------------------------------------------------------------------------|
| White SJW, et al<br>(2019b)  | 30-day mortality     | Steroid group: 14/418<br>Non-steroid group: 59/7518       | 4.38 [2.43, 7.91]  | 2.42 [1.30, 4.51]    | Age, sex, comorbidities, functional status, ASA class                                   |
| Overall complications        |                      |                                                           |                    |                      |                                                                                         |
| Aziz KT, et al<br>(2021)     | 30-day complications | Steroid group: 57/1662<br>Non-steroid group: 885/98308    | 3.91 [2.98, 5.13]  | NA                   | NA                                                                                      |
| Boddapati V, et al<br>(2018) | 30-day complications | Steroid group: 293/3714<br>Non-steroid group: 4764/97818  | 1.67 [1.48, 1.89]  | 1.30 [1.08, 1.57]    | Age, sex, BMI, comorbidities, ASA class, anesthesia type, operative duration (Matching) |
| Cloney MB, et al<br>(2018)   | 30-day complications | Steroid group: 51/353<br>Non-steroid group: 782/8139      | 1.59 [1.17, 2.16]  | 1.38 [1.01, 1.90]    | Baseline demographics and clinical data                                                 |
| Kebaish KJ, et al<br>(2021)  | 30-day complications | Steroid group: 466/5243<br>Non-steroid group: 6098/135276 | 2.07 [1.87, 2.28]  | 1.61 [1.45, 1.78]    | Age, sex, BMI, functional status, procedure type, and ASA class                         |
| Newton WN, et al<br>(2023)   | 30-day complications | Steroid group: 5/93<br>Non-steroid group: 14/1205         | 4.83 [1.70, 13.73] | NA                   | NA                                                                                      |
| Quan, et al<br>(2022)        | 30-day complications | Steroid group: 10/360<br>Non-steroid group: 198/16145     | 2.30 [1.21, 4.38]  | 0.997 [0.499, 1.992] | Age, sex, BMI, functional status, ASA class, comorbidities                              |
| Tihista M, et al<br>(2020)   | 30-day complications | Steroid group: 96/1044<br>Non-steroid group: 1258/25690   | 1.97 [1.58, 2.44]  | 1.54 [1.23, 1.94]    | Age, sex, BMI, functional status, ASA class, and comorbidities                          |
| Wound dehiscence             |                      |                                                           |                    |                      |                                                                                         |

|                               |                          |                                                                                                            |                                                                                                    |                                                                                                    |                                                                                         |
|-------------------------------|--------------------------|------------------------------------------------------------------------------------------------------------|----------------------------------------------------------------------------------------------------|----------------------------------------------------------------------------------------------------|-----------------------------------------------------------------------------------------|
| Boddapati V, et al (2018)     | 30-day wound dehiscence  | Steroid group: 8/3714<br>Non-steroid group: 108/97818                                                      | 1.95 [0.95, 4.01]                                                                                  | 2.33 [0.60, 9.02]                                                                                  | Age, sex, BMI, comorbidities, ASA class, anesthesia type, operative duration (Matching) |
| Cloney MB, et al (2018)       | 30-day wound dehiscence  | Steroid group: 1/353<br>Non-steroid group: 29/8139                                                         | 0.79 [0.11, 5.85]                                                                                  | NA                                                                                                 | NA                                                                                      |
| Fassihi SC, et al (2020)      | 30-day wound dehiscence  | Steroid group: 2/474<br>Non-steroid group: 42/10499                                                        | 1.05 [0.25, 4.37]                                                                                  | NA                                                                                                 | NA                                                                                      |
| Ifarraguerri AM, et al (2023) | 30-day wound dehiscence  | Steroid group: 1/178<br>Non-steroid group: 35/10153                                                        | 1.63 [0.22, 11.99]                                                                                 | NA                                                                                                 | NA                                                                                      |
| Kebaish KJ, et al (2021)      | 30-day wound dehiscence  | Steroid group: 19/5243<br>Non-steroid group: 299/135276                                                    | 1.64 [1.03, 2.61]                                                                                  | NA                                                                                                 | NA                                                                                      |
| Kittle H, et al (2020)        | 30-day wound dehiscence  | Steroid group: 56/14774<br>Non-steroid group: 668/388792                                                   | 2.21 [1.68, 2.91]                                                                                  | NA                                                                                                 | NA                                                                                      |
| Lee R, et al (2020)           | 30-day wound dehiscence  | Steroid group: 0/198<br>Non-steroid group: 2/5179                                                          | 5.22 [0.25, 109.02]                                                                                | NA                                                                                                 | NA                                                                                      |
| Newton WN, et al (2023)       | 30-day wound dehiscence  | Steroid group: 0/93<br>Non-steroid group: 1/1205                                                           | 4.29 [0.17, 106.14]                                                                                | NA                                                                                                 | NA                                                                                      |
| Roberts S, et al (2021)       | 3-month wound dehiscence | Steroid group (< 6m) <sup>a</sup> : 32/2800<br>Steroid group (> 6m): 28/2611<br>Non-steroid group: 39/3704 | 1.09 [0.68, 1.74] <sup>b</sup><br>1.02 [0.63, 1.66] <sup>c</sup><br>1.07 [0.64, 1.78] <sup>d</sup> | 0.96 [0.55, 1.69] <sup>b</sup><br>0.88 [0.49, 1.58] <sup>c</sup><br>1.09 [0.61, 1.95] <sup>d</sup> | Age, sex, and Charlson Comorbidity Index (Matching)                                     |
| Tihista M, et al (2020)       | 30-day wound dehiscence  | Steroid group: 2/1044<br>Non-steroid group: 73/25690                                                       | 0.67 [0.17, 2.75]                                                                                  | NA                                                                                                 | NA                                                                                      |
| White SJW, et al (2019a)      | 30-day wound dehiscence  | Steroid group: 2/289<br>Non-steroid group: 22/9194                                                         | 2.91 [0.68, 12.41]                                                                                 | NA                                                                                                 | NA                                                                                      |

|                                  |                         |                                                           |                   |                   |                                                                                         |
|----------------------------------|-------------------------|-----------------------------------------------------------|-------------------|-------------------|-----------------------------------------------------------------------------------------|
| White SJW, et al<br>(2019b)      | 30-day wound dehiscence | Steroid group: 8/418<br>Non-steroid group: 44/7518        | 3.31 [1.55, 7.09] | 3.12 [1.45, 6.70] | Age, sex, comorbidities, functional status, ASA class                                   |
| Re-admission                     |                         |                                                           |                   |                   |                                                                                         |
| Boddapati V, et al<br>(2018)     | 30-day readmission      | Steroid group: 242/3714<br>Non-steroid group: 3453/97818  | 1.90 [1.66, 2.18] | 1.50 [1.21, 1.87] | Age, sex, BMI, comorbidities, ASA class, anesthesia type, operative duration (Matching) |
| Boylan MR, et al<br>(2016)       | 30-day readmission      | Steroid group: NA/402<br>Non-steroid group: NA/104720     | NA                | 1.45 [1.14, 1.85] | Age, sex, race, year of surgery (Matching)                                              |
|                                  | 90-day readmission      | Steroid group: NA/402<br>Non-steroid group: NA/104720     | NA                | 1.37 [1.09, 1.73] | Age, sex, race, year of surgery (Matching)                                              |
| Cloney MB, et al<br>(2018)       | 30-day readmission      | Steroid group: 33/353<br>Non-steroid group: 488/8139      | 1.62 [1.12, 2.34] | NA                | NA                                                                                      |
| Ifarraguerri AM,<br>et al (2023) | 30-day readmission      | Steroid group: 13/178<br>Non-steroid group: 197/10153     | 3.98 [2.23, 7.13] | 2.13 [1.12, 4.05] | Age, sex, BMI, comorbidities, ASA class                                                 |
| Kebaish KJ, et al<br>(2021)      | 30-day readmission      | Steroid group: 414/5243<br>Non-steroid group: 5389/135276 | 2.07 [1.86, 2.29] | 1.68 [1.51, 1.87] | Age, sex, BMI, functional status, procedure type, and ASA                               |
| Kittle H, et al<br>(2020)        | 30-day readmission      | Steroid group: 50/14774<br>Non-steroid group: 844/388792  | 1.56 [1.17, 2.08] | NA                | NA                                                                                      |
| Lee R, et al<br>(2020)           | 30-day readmission      | Steroid group: 8/198<br>Non-steroid group: 177/5179       | 1.19 [0.58, 2.45] | 1.15 [0.52, 2.52] | Age, sex, smoking, comorbidities, ASA class (PS-matching)                               |
| Newton WN, et al<br>(2023)       | 30-day readmission      | Steroid group: 2/93<br>Non-steroid group: 20/1205         | 1.30 [0.30, 5.66] | NA                | NA                                                                                      |

|                                  |                            |                                                                                                               |                                                                                                    |                                                                                                    |                                                                                         |
|----------------------------------|----------------------------|---------------------------------------------------------------------------------------------------------------|----------------------------------------------------------------------------------------------------|----------------------------------------------------------------------------------------------------|-----------------------------------------------------------------------------------------|
| Roberts S, et al<br>(2021)       | 6-month readmission        | Steroid group (< 6m) <sup>a</sup> : 499/2800<br>Steroid group (> 6m): 433/2611<br>Non-steroid group: 550/3704 | 1.24 [1.09, 1.42] <sup>b</sup><br>1.14 [0.99, 1.31] <sup>c</sup><br>0.82 [0.42, 1.61] <sup>d</sup> | 1.14 [0.97, 1.34] <sup>b</sup><br>1.00 [0.85, 1.17] <sup>c</sup><br>1.14 [0.98, 1.34] <sup>d</sup> | Age, sex, and Charlson Comorbidity Index (Matching)                                     |
| Tihista M, et al<br>(2020)       | 30-day readmission         | Steroid group: 11/1044<br>Non-steroid group: 126/25690                                                        | 2.16 [1.16, 4.01]                                                                                  | NA                                                                                                 | NA                                                                                      |
| Re-operation                     |                            |                                                                                                               |                                                                                                    |                                                                                                    |                                                                                         |
| Boddapati V, et al<br>(2018)     | Reoperation within 30 days | Steroid group: 115/3714<br>Non-steroid group: 1966/97818                                                      | 1.56 [1.29, 1.89]                                                                                  | 1.04 [0.79, 1.37]                                                                                  | Age, sex, BMI, comorbidities, ASA class, anesthesia type, operative duration (Matching) |
| Boylan MR, et al<br>(2016)       | Revision within 12-month   | Steroid group: NA/402<br>Non-steroid group: NA/104720                                                         | NA                                                                                                 | 2.49 [1.35, 4.59]                                                                                  | Age, sex, race, year of surgery (Matching)                                              |
|                                  | Revision within 24-month   | Steroid group: NA/402<br>Non-steroid group: NA/104720                                                         | NA                                                                                                 | 2.04 [1.19, 3.50]                                                                                  | Age, sex, race, year of surgery (Matching)                                              |
| Cloney MB, et al<br>(2018)       | Reoperation within 30 days | Steroid group: 23/353<br>Non-steroid group: 292/8139                                                          | 1.87 [1.21, 2.90]                                                                                  | NA                                                                                                 | NA                                                                                      |
| Fassihi SC, et al<br>(2020)      | Reoperation within 30 days | Steroid group: 14/474<br>Non-steroid group: 332/10499                                                         | 0.93 [0.54, 1.60]                                                                                  | NA                                                                                                 | NA                                                                                      |
| Ifarraguerri AM,<br>et al (2023) | Reoperation within 30 days | Steroid group: 4/178<br>Non-steroid group: 160/10153                                                          | 1.44 [0.53, 3.92]                                                                                  | NA                                                                                                 | NA                                                                                      |
| Kebaish KJ, et al<br>(2021)      | Reoperation within 30 days | Steroid group: 188/5243<br>Non-steroid group: 3098/135276                                                     | 1.59 [1.37, 1.84]                                                                                  | 1.37 [1.17, 1.59]                                                                                  | Age, sex, BMI, functional status, procedure type, and ASA class                         |
| Lee R, et al<br>(2020)           | Reoperation within 30 days | Steroid group: 3/198<br>Non-steroid group: 81/5179                                                            | 0.97 [0.30, 3.09]                                                                                  | 1.25 [0.35, 4.48]                                                                                  | Age, sex, smoking, comorbidities, ASA class (Matching)                                  |

|                         |                            |                                                                                                              |                                                                                                    |                                                                                                    |                                                            |
|-------------------------|----------------------------|--------------------------------------------------------------------------------------------------------------|----------------------------------------------------------------------------------------------------|----------------------------------------------------------------------------------------------------|------------------------------------------------------------|
| Newton WN, et al (2023) | Reoperation within 30 days | Steroid group: 1/93<br>Non-steroid group: 8/1205                                                             | 1.63 [0.20, 13.14]                                                                                 | NA                                                                                                 | NA                                                         |
| Quan, et al (2022)      | Reoperation within 30 days | Steroid group: 8/360<br>Non-steroid group: 164/16145                                                         | 2.21 [1.08, 4.54]                                                                                  | 2.06 [0.99, 4.31]                                                                                  | Age, sex, BMI, functional status, ASA class, comorbidities |
| Roberts S, et al (2021) | Revision within 6-month    | Steroid group (< 6m) <sup>a</sup> : 109/2800                                                                 | 1.42 [1.08, 1.86] <sup>b</sup>                                                                     | 1.33 [0.95, 1.86] <sup>b</sup>                                                                     | Age, sex, and Charlson Comorbidity Index (Matching)        |
|                         |                            | Steroid group (> 6m): 71/2611                                                                                | 0.98 [0.72, 1.33] <sup>c</sup>                                                                     | 0.95 [0.66, 1.36] <sup>c</sup>                                                                     |                                                            |
|                         |                            | Non-steroid group: 103/3704                                                                                  | 1.45 [1.07, 1.96] <sup>d</sup>                                                                     | 1.40 [1.00, 1.96] <sup>d</sup>                                                                     |                                                            |
|                         | Revision within 12-month   | Steroid group (< 6m) <sup>a</sup> : 150/2800<br>Steroid group (> 6m): 99/2611<br>Non-steroid group: 136/3704 | 1.49 [1.17, 1.88] <sup>b</sup><br>1.03 [0.79, 1.35] <sup>c</sup><br>1.44 [1.11, 1.86] <sup>d</sup> | 1.48 [1.10, 1.98] <sup>b</sup><br>1.08 [0.79, 1.47] <sup>c</sup><br>1.37 [1.03, 1.82] <sup>d</sup> | Age, sex, and Charlson Comorbidity Index (Matching)        |
| Tihista M, et al (2020) | Reoperation within 30 days | Steroid group: 0/1044<br>Non-steroid group: 9/25690                                                          | 1.29 [0.08, 22.25]                                                                                 | NA                                                                                                 | NA                                                         |

<sup>f</sup>CI's were calculated based on the provided odds ratio and its standard error, which was deviated from the reported data in original articles.

<sup>a</sup>This study divided steroids using group into two groups with exposure > 6 months or < 6 months (exposure < 6 months were presented first)

<sup>b</sup>Exposure < 6 months compared with non-exposure group

<sup>c</sup>Exposure > 6 months compared with non-exposure group

<sup>d</sup>Exposure < 6 months compared with exposure > 6 months

OR, odds ratio; BMI, body mass index; ASA class, American Society of Anesthesiologists Classification



**Table S3.** Summary of Crude and Adjusted Risk Estimates of Infectious Complications.

| Study                         | Outcome of interest                                     | Event/total (n/N)                                         | Crude OR [95%CI]   | Adjusted OR [95%CI] | Adjusted factors                                                                        |
|-------------------------------|---------------------------------------------------------|-----------------------------------------------------------|--------------------|---------------------|-----------------------------------------------------------------------------------------|
| Any infectious complications  |                                                         |                                                           |                    |                     |                                                                                         |
| Aziz KT, et al (2021)         | 30-day sepsis, superficial and deep SSI                 | Steroid group: 17/1662<br>Non-steroid group: 393/98308    | 2.57 [1.58, 4.19]  | 1.9 [1.13, 3.20]    | Demographics and comorbidities                                                          |
| Cloney MB, et al (2018)       | 30-day sepsis, UTI, pneumonia, superficial and deep SSI | Steroid group: 34/353<br>Non-steroid group: 414/8139      | 1.99 [1.38, 2.87]  | 1.65 [1.13, 2.41]   | Baseline demographics and clinical data                                                 |
| Kebaish KJ, et al (2021)      | 30-day sepsis, UTI, pneumonia, superficial and deep SSI | Steroid group: 381/5243<br>Non-steroid group: 4953/135276 | 2.06 [1.85, 2.30]  | 1.60 [1.42, 1.79]   | Age, sex, BMI, functional status, procedure type, and ASA class                         |
| Sepsis                        |                                                         |                                                           |                    |                     |                                                                                         |
| Boddapati V, et al (2018)     | 30-day sepsis                                           | Steroid group: 31/3714<br>Non-steroid group: 274/97818    | 3.00 [2.06, 4.35]  | 2.07 [1.09, 3.92]   | Age, sex, BMI, comorbidities, ASA class, anesthesia type, operative duration (Matching) |
| Cloney MB, et al (2018)       | 30-day sepsis                                           | Steroid group: 9/353<br>Non-steroid group: 84/8139        | 2.51 [1.25, 5.03]  | NA                  | NA                                                                                      |
| Fassihi SC, et al (2020)      | 30-day sepsis                                           | Steroid group: 4/474<br>Non-steroid group: 39/10499       | 2.28 [0.81, 6.41]  | NA                  | NA                                                                                      |
| Ifarraguerri AM, et al (2023) | 30-day sepsis                                           | Steroid group: 3/178<br>Non-steroid group: 28/10153       | 6.20 [1.87, 20.58] | 3.38 [0.90, 12.64]  | Age, sex, BMI, comorbidities, ASA class                                                 |
| Kebaish KJ, et al (2021)      | 30-day sepsis                                           | Steroid group: 77/5243<br>Non-steroid group: 886/135276   | 2.26 [1.79, 2.86]  | NA                  | NA                                                                                      |
| Kittle H, et al (2020)        | 30-day sepsis                                           | Steroid group: 0/14774<br>Non-steroid group: 11/388792    | 1.14 [0.07, 19.42] | NA                  | NA                                                                                      |

|                               |                        |                                                                                                               |                                                                                                    |                                                                                                    |                                                                                         |
|-------------------------------|------------------------|---------------------------------------------------------------------------------------------------------------|----------------------------------------------------------------------------------------------------|----------------------------------------------------------------------------------------------------|-----------------------------------------------------------------------------------------|
| Lee R, et al (2020)           | 30-day sepsis          | Steroid group: 1/198<br>Non-steroid group: 11/5179                                                            | 2.38 [0.31, 18.56]                                                                                 | 1.67 [0.17, 16.14]                                                                                 | Age, sex, smoking, comorbidities, ASA class (Matching)                                  |
| Newton WN, et al (2023)       | 30-day sepsis          | Steroid group: 0/93<br>Non-steroid group: 2/1205                                                              | 2.57 [0.12, 54.01]                                                                                 | NA                                                                                                 | NA                                                                                      |
| Quan, et al (2022)            | 30-day sepsis          | Steroid group: 1/360<br>Non-steroid group: 13/16145                                                           | 3.46 [0.45, 26.49]                                                                                 | NA                                                                                                 | NA                                                                                      |
| Roberts S, et al (2021)       | 3-month sepsis         | Steroid group (< 6m) <sup>a</sup> : 171/2800<br>Steroid group (> 6m): 116/2611<br>Non-steroid group: 177/3704 | 1.30 [1.04, 1.61] <sup>b</sup><br>0.93 [0.73, 1.18] <sup>c</sup><br>1.40 [1.10, 1.78] <sup>d</sup> | 1.16 [0.90, 1.51] <sup>b</sup><br>0.75 [0.56, 1.01] <sup>c</sup><br>1.54 [1.16, 2.05] <sup>d</sup> | Age, sex, and Charlson Comorbidity Index (Matching)                                     |
| Tihista M, et al (2020)       | 30-day sepsis          | Steroid group: 10/1044<br>Non-steroid group: 103/25690                                                        | 2.40 [1.25, 4.61]                                                                                  | 1.85 [0.92, 3.72]                                                                                  | Age, sex, BMI, functional status, ASA class, and comorbidities                          |
| White SJW, et al (2019a)      | 30-day sepsis          | Steroid group: 5/289<br>Non-steroid group: 50/9194                                                            | 3.22 [1.27, 8.13]                                                                                  | NA                                                                                                 | NA                                                                                      |
| White SJW, et al (2019b)      | 30-day sepsis          | Steroid group: 10/418<br>Non-steroid group: 135/7518                                                          | 1.34 [0.70, 2.57]                                                                                  | NA                                                                                                 | NA                                                                                      |
| Surgical site infection (SSI) |                        |                                                                                                               |                                                                                                    |                                                                                                    |                                                                                         |
| Boddapati V, et al (2018)     | 30-day superficial SSI | Steroid group: 38/3714<br>Non-steroid group: 665/97818                                                        | 1.51 [1.09, 2.10]                                                                                  | 1.73 [1.02, 2.93]                                                                                  | Age, sex, BMI, comorbidities, ASA class, anesthesia type, operative duration (Matching) |
|                               | 30-day deep SSI        | Steroid group: 25/3714<br>Non-steroid group: 284/97818                                                        | 2.33 [1.54, 3.51]                                                                                  | 1.92 [0.95, 3.86]                                                                                  | Age, sex, BMI, comorbidities, ASA class, anesthesia type, operative duration (Matching) |
| Cloney MB, et al (2018)       | 30-day superficial SSI | Steroid group: 7/353<br>Non-steroid group: 117/8139                                                           | 1.39 [0.64, 3.00]                                                                                  | NA                                                                                                 | NA                                                                                      |
|                               | 30-day deep SSI        | Steroid group: 6/353<br>Non-steroid group: 63/8139                                                            | 2.22 [0.95, 5.16]                                                                                  | NA                                                                                                 | NA                                                                                      |

|                               |                            |                                                            |                    |                    |                                                        |
|-------------------------------|----------------------------|------------------------------------------------------------|--------------------|--------------------|--------------------------------------------------------|
| Fassihi SC, et al (2020)      | 30-day superficial SSI     | Steroid group: 1/474<br>Non-steroid group: 71/10499        | 0.31 [0.04, 2.24]  | NA                 | NA                                                     |
|                               | 30-day deep SSI            | Steroid group: 4/474<br>Non-steroid group: 53/10499        | 1.68 [0.60, 4.65]  | NA                 | NA                                                     |
| Ifarraguerri AM, et al (2023) | 30-day superficial SSI     | Steroid group: 2/178<br>Non-steroid group: 70/10153        | 1.64 [0.40, 6.73]  | NA                 | NA                                                     |
|                               | 30-day deep SSI            | Steroid group: 1/178<br>Non-steroid group: 33/10153        | 1.73 [0.24, 12.74] | NA                 | NA                                                     |
| Kebaish KJ, et al (2021)      | 30-day superficial SSI     | Steroid group: 78/5243<br>Non-steroid group: 1225/135276   | 1.65 [1.31, 2.08]  | NA                 | NA                                                     |
|                               | 30-day deep SSI            | Steroid group: 80/5243<br>Non-steroid group: 833/135276    | 2.50 [1.98, 3.15]  | NA                 | NA                                                     |
| Kittle H, et al (2020)        | 30-day deep SSI            | Steroid group: 54/14774<br>Non-steroid group: 727/388792   | 1.96 [1.48, 2.58]  | NA                 | NA                                                     |
|                               | 30-day SSI                 | Steroid group: 116/14774<br>Non-steroid group: 2126/388792 | 1.44 [1.19, 1.74]  | NA                 | NA                                                     |
|                               | 30-day any wound infection | Steroid group: 269/14774<br>Non-steroid group: 4247/388792 | 1.68 [1.48, 1.90]  | NA                 | NA                                                     |
| Lee R, et al (2020)           | 30-day superficial SSI     | Steroid group: 1/198<br>Non-steroid group: 15/5179         | 1.75 [0.23, 13.30] | 1.67 [0.17, 16.14] | Age, sex, smoking, comorbidities, ASA class (Matching) |
|                               | 30-day deep SSI            | Steroid group: 0/198<br>Non-steroid group: 13/5179         | 0.96 [0.06, 16.27] | 0.38 [0.02, 6.80]  | Age, sex, smoking, comorbidities, ASA class (Matching) |

|                          |                        |                                                                                                            |                                                                                                    |                                                                                                    |                                                                            |
|--------------------------|------------------------|------------------------------------------------------------------------------------------------------------|----------------------------------------------------------------------------------------------------|----------------------------------------------------------------------------------------------------|----------------------------------------------------------------------------|
| Newton WN, et al (2023)  | 30-day SSI             | Steroid group: 2/93<br>Non-steroid group: 8/1205                                                           | 3.29 [0.69, 15.71]                                                                                 | NA                                                                                                 | NA                                                                         |
| Roberts S, et al (2021)  | 3-month SSI            | Steroid group (< 6m) <sup>a</sup> : 76/2800<br>Steroid group (> 6m): 61/2611<br>Non-steroid group: 95/3704 | 1.06 [0.78, 1.44] <sup>b</sup><br>0.91 [0.66, 1.26] <sup>c</sup><br>1.17 [0.83, 1.64] <sup>d</sup> | 0.86 [0.59, 1.26] <sup>b</sup><br>0.74 [0.50, 1.10] <sup>c</sup><br>1.16 [0.77, 1.75] <sup>d</sup> | Age, sex, and Charlson Comorbidity Index (Matching)                        |
| Singla A, et al (2019)   | 3-month SSI            | Steroid group: 284/11687<br>Non-steroid group: 5725/348318                                                 | 1.47 [1.31, 1.66]                                                                                  | 1.74 [1.33, 1.92]                                                                                  | Comorbidities                                                              |
|                          | 1-year SSI             | Steroid group: 330/11687<br>Non-steroid group: 6682/348318                                                 | 1.49 [1.33, 1.66]                                                                                  | 1.88 [1.41, 2.01]                                                                                  | Comorbidities                                                              |
| Tihista M, et al (2020)  | 30-day superficial SSI | Steroid group: 15/1044<br>Non-steroid group: 225/25690                                                     | 1.65 [0.97, 2.79]                                                                                  | NA                                                                                                 | NA                                                                         |
|                          | 30-day deep SSI        | Steroid group: 10/1044<br>Non-steroid group: 112/25690                                                     | 2.21 [1.15, 4.23]                                                                                  | 1.80 [0.86, 3.77] <sup>¶</sup>                                                                     | Age, sex, BMI, functional status, ASA class, and comorbidities             |
| White SJW, et al (2019a) | 30-day superficial SSI | Steroid group: 3/289<br>Non-steroid group: 103/9194                                                        | 0.93 [0.29, 2.94]                                                                                  | NA                                                                                                 | NA                                                                         |
|                          | 30-day deep SSI        | Steroid group: 5/289<br>Non-steroid group: 47/9194                                                         | 3.43 [1.35, 8.68]                                                                                  | 2.78 [1.09, 7.10]                                                                                  | Age, sex, comorbidities, functional status, ASA class, operative variables |
| White SJW, et al (2019b) | 30-day superficial SSI | Steroid group: 4/418<br>Non-steroid group: 69/7518                                                         | 1.04 [0.38, 2.87]                                                                                  | NA                                                                                                 | NA                                                                         |
|                          | 30-day deep SSI        | Steroid group: 6/418<br>Non-steroid group: 72/7518                                                         | 1.51 [0.65, 3.48]                                                                                  | NA                                                                                                 | NA                                                                         |

¶CIs were calculated based on the provided odds ratio and its standard error, which was deviated from the reported data in original articles.

<sup>a</sup>This study divided steroids using group into two groups with exposure > 6 months or < 6 months (exposure < 6 months were presented first)

<sup>b</sup>Exposure < 6 months compared with non-exposure group

<sup>c</sup>Exposure > 6 months compared with non-exposure group

<sup>d</sup>Exposure < 6 months compared with exposure > 6 months

OR, odds ratio; BMI, body mass index; ASA class, American Society of Anesthesiologists Classification; SSI, surgical site infection; UTI, urinary tract infection

**Table S4.** Summary of Crude and Adjusted Risk Estimates of Thromboembolism Events.

| Study                            | Outcome of interest       | Event/total (n/N)                                         | Crude OR [95%CI]   | Adjusted OR [95%CI] | Adjusted factors                                                                        |
|----------------------------------|---------------------------|-----------------------------------------------------------|--------------------|---------------------|-----------------------------------------------------------------------------------------|
| Composite thromboembolism events |                           |                                                           |                    |                     |                                                                                         |
| Boddapati V, et al (2018)        | DVT and PE within 30 days | Steroid group: 33/3714<br>Non-steroid group: 616/97818    | 1.41 [1.00, 2.01]  | 1.04 [0.59, 1.83]   | Age, sex, BMI, comorbidities, ASA class, anesthesia type, operative duration (Matching) |
| Boylan MR, et al (2016)          | DVT and PE within 30 days | Steroid group: NA/402<br>Non-steroid group: NA/104720     | NA                 | 2.39 [1.08, 5.26]   | Age, sex, race, year of surgery (Matching)                                              |
|                                  | DVT and PE within 90 days | Steroid group: NA/402<br>Non-steroid group: NA/104720     | NA                 | 1.91 [1.03, 3.53]   | Age, sex, race, year of surgery (Matching)                                              |
| Cloney MB, et al (2018)          | DVT and PE within 30 days | Steroid group: 7/353<br>Non-steroid group: 115/8139       | 1.41 [0.65, 3.05]  | NA                  | NA                                                                                      |
| Kantar RS, et al                 | DVT and PE within 30 days | Steroid group: 107/6575<br>Non-steroid group: 2008/223029 | 1.82 [1.49, 2.21]  | 1.36 [1.11, 1.66]   | Age, sex, race, BMI, comorbidities, ASA class, type of operation, etc.                  |
| Kebaish KJ, et al (2021)         | DVT and PE within 30 days | Steroid group: 92/5243<br>Non-steroid group: 1016/135276  | 2.36 [1.90, 2.93]  | NA                  | NA                                                                                      |
| Kittle H, et al (2020)           | DVT and PE within 30 days | Steroid group: 57/14774<br>Non-steroid group: 1672/388792 | 0.90 [0.69, 1.17]  | NA                  | NA                                                                                      |
| Quan, et al (2022)               | DVT and PE within 30 days | Steroid group: 1/360<br>Non-steroid group: 11/16145       | 4.09 [0.53, 31.73] | NA                  | NA                                                                                      |
| Tihista M, et al (2020)          | DVT and PE within 30 days | Steroid group: 14/1044<br>Non-steroid group: 154/25690    | 2.25 [1.30, 3.91]  | 1.92 [1.20, 3.36]   | Age, sex, BMI, functional status, ASA class, and comorbidities                          |
| Pulmonary embolism (PE)          |                           |                                                           |                    |                     |                                                                                         |
| Cloney MB, et al (2018)          | 30-day PE                 | Steroid group: 3/353<br>Non-steroid group: 50/8139        | 1.39 [0.43, 4.47]  | NA                  | NA                                                                                      |

|                               |            |                                                      |                     |                      |                                                        |
|-------------------------------|------------|------------------------------------------------------|---------------------|----------------------|--------------------------------------------------------|
| Ifarraguerri AM, et al (2023) | 30-day PE  | Steroid group: 2/178<br>Non-steroid group: 26/10153  | 4.43 [1.04, 18.79]  | 4.83 [1.07, 21.89]   | Age, sex, BMI, comorbidities, ASA class                |
| Lee R, et al (2020)           | 30-day PE  | Steroid group: 1/198<br>Non-steroid group: 8/5179    | 3.28 [0.41, 26.36]  | 15.05 [0.61, 370.72] | Age, sex, smoking, comorbidities, ASA class (Matching) |
| White SJW, et al (2019a)      | 30-day PE  | Steroid group: 1/289<br>Non-steroid group: 56/9194   | 0.57 [0.08, 4.11]   | NA                   | NA                                                     |
| White SJW, et al (2019b)      | 30-day PE  | Steroid group: 34/418<br>Non-steroid group: 308/7518 | 2.07 [1.43, 3.00]   | NA                   | NA                                                     |
| Deep vein thrombosis (DVT)    |            |                                                      |                     |                      |                                                        |
| Cloney MB, et al (2018)       | 30-day DVT | Steroid group: 6/353<br>Non-steroid group: 84/8139   | 1.66 [0.72, 3.82]   | NA                   | NA                                                     |
| Ifarraguerri AM, et al (2023) | 30-day DVT | Steroid group: 0/178<br>Non-steroid group: 46/10153  | 0.61 [0.04, 9.92]   | NA                   | NA                                                     |
| Lee R, et al (2020)           | 30-day DVT | Steroid group: 1/198<br>Non-steroid group: 16/5179   | 1.64 [0.22, 12.41]  | 1.67 [0.17, 16.14]   | Age, sex, smoking, comorbidities, ASA class (Matching) |
| Newton WN, et al (2023)       | 30-day DVT | Steroid group: 0/93<br>Non-steroid group: 1/1205     | 4.29 [0.17, 106.14] | NA                   | NA                                                     |
| White SJW, et al (2019a)      | 30-day DVT | Steroid group: 26/289<br>Non-steroid group: 84/9194  | 10.72 [6.79, 16.93] | NA                   | NA                                                     |
| White SJW, et al (2019b)      | 30-day DVT | Steroid group: 17/418<br>Non-steroid group: 122/7518 | 2.57 [1.53, 4.31]   | 2.10 [1.24, 3.55]    | Age, sex, comorbidities, functional status, ASA class  |

OR, odds ratio; BMI, body mass index; ASA class, American Society of Anesthesiologists Classification; DVT, deep vein thrombosis; PE, pulmonary embolism

**Table S5.** Subgroup Analysis for Each Outcome Based on Adjustment Methods of Confounding Factors.

| Outcome and subgroups               | No. of studies | Effect size (OR [95%CI]) | I <sup>2</sup> (%) | Test for subgroup differences ( <i>P</i> ) |
|-------------------------------------|----------------|--------------------------|--------------------|--------------------------------------------|
| Mortality                           |                |                          |                    |                                            |
| Overall adjusted analyses           | 4              | 1.40 [0.64, 3.09]        | 52                 | 0.44                                       |
| Adjusted by matched data            | 2              | 2.41 [0.34, 17.24]       | 73                 |                                            |
| Adjusted by multivariate regression | 2              | 1.04 [0.47, 2.32]        | 35                 |                                            |
| Overall complications               |                |                          |                    |                                            |
| Overall adjusted analyses           | 3              | 1.42 [1.16, 1.75]        | 0                  | 0.65                                       |
| Adjusted by matched data            | 1              | 1.30 [1.08, 1.57]        | NA                 |                                            |
| Adjusted by multivariate regression | 2              | 1.44 [0.97, 2.14]        | 45                 |                                            |
| Re-admission                        |                |                          |                    |                                            |
| Overall adjusted analyses           | 5              | 1.62 [1.48, 1.77]        | 0                  | 0.14                                       |
| Adjusted by matched data            | 3              | 1.46 [1.25, 1.72]        | 0                  |                                            |
| Adjusted by multivariate regression | 2              | 1.69 [1.52, 1.88]        | 0                  |                                            |
| 30-day re-operation                 |                |                          |                    |                                            |
| Overall adjusted analyses           | 4              | 1.28 [1.03, 1.59]        | 32                 | 0.10                                       |
| Adjusted by matched data            | 2              | 1.05 [0.80, 1.37]        | 0                  |                                            |
| Adjusted by multivariate regression | 2              | 1.42 [1.12, 1.81]        | 13                 |                                            |
| Sepsis                              |                |                          |                    |                                            |
| Overall adjusted analyses           | 4              | 2.07 [1.34, 3.21]        | 0                  | 0.94                                       |
| Adjusted by matched data            | 2              | 2.04 [1.10, 3.77]        | 0                  |                                            |
| Adjusted by multivariate regression | 2              | 2.11 [1.14, 3.91]        | 0                  |                                            |
| Deep surgical site infection        |                |                          |                    |                                            |
| Overall adjusted analyses           | 4              | 1.96 [1.26, 3.05]        | 0                  | 0.63                                       |
| Adjusted by matched data            | 2              | 1.61 [0.59, 4.34]        | 12                 |                                            |
| Adjusted by multivariate regression | 2              | 2.13 [1.19, 3.80]        | 0                  |                                            |
| Thromboembolism events              |                |                          |                    |                                            |
| Overall adjusted analyses           | 3              | 1.61 [0.99, 2.63]        | 44                 | 0.63                                       |
| Adjusted by matched data            | 2              | 1.50 [0.67, 3.37]        | 64                 |                                            |
| Adjusted by multivariate regression | 1              | 1.92 [1.10, 3.36]        | NA                 |                                            |
| Pulmonary embolism                  |                |                          |                    |                                            |
| Overall adjusted analyses           | 2              | 5.94 [1.52, 23.29]       | 0                  | 0.53                                       |
| Adjusted by matched data            | 1              | 15.05 [0.61, 370.72]     | NA                 |                                            |
| Adjusted by multivariate regression | 1              | 4.83 [1.07, 21.89]       | NA                 |                                            |
| Deep vein thrombosis                |                |                          |                    |                                            |
| Overall adjusted analyses           | 2              | 2.07 [1.24, 3.46]        | 0                  | 0.85                                       |
| Adjusted by matched data            | 1              | 1.67 [0.17, 16.14]       | NA                 |                                            |
| Adjusted by multivariate regression | 1              | 2.10 [1.24, 3.55]        | NA                 |                                            |
